# Supplementary material for: A capillary-based centrifugal indicator equipped with in situ pathogenic bacteria culture for fast antimicrobial susceptibility testing
Source: Royal Society of Chemistry journal article supplement (doi:10.1039/d3an02144k), 2024-01-01
Supplement: d3an02144k1.pdf [file d3an02144k1.pdf]

## Supporting Information

# A capillary-based centrifugal indicator equipped with in-situ pathogenic bacteria culture for fast antimicrobial susceptibility testing

Longyu Chen <sup>a</sup>, Meijia Zhu <sup>a</sup>, Zhiyong Wang <sup>b</sup>, Hongliang Wang <sup>c</sup>, Yongqiang Cheng <sup>a\*</sup>, Ziwei

Zhang <sup>a</sup>, Xiaoxiao Qi <sup>a</sup>, Yifan Shao <sup>a</sup>, Xi Zhang <sup>a</sup>, Hongwei Wang <sup>d</sup>

<sup>a</sup> Institute of Eco-Environmental Forensics, Qingdao Institute of Humanities and Social Sciences,  
Shandong University

<sup>b</sup> China Academy of Building Research, Beijing, 100013, China

<sup>c</sup> National Deep Sea Center, Qingdao 266237, China

<sup>d</sup> Department of Clinical Laboratory, The Affiliated Hospital of Qingdao University, Qingdao,  
Shandong 266003, China.

**\*Corresponding author:** Yongqiang Cheng

Institute of Eco-Environmental Forensics, Shandong University (Qingdao), No. 72, Binhai Road,  
Jimo District, Qingdao, Shandong Province, 266237, China.

Email: chengyongqiang@sdu.edu.cn



**Table S3** The AST results comparison for three clinical urine samples based on the CBCI system and the clinical standard methods. S, susceptible; I, intermediate; R, resistant.

| Urine samples | Sample 1       |                  |            | Sample 2                     |                  |            | Sample 3                    |                  |            |
|---------------|----------------|------------------|------------|------------------------------|------------------|------------|-----------------------------|------------------|------------|
|               | <i>E. coli</i> |                  |            | <i>Klebsiella pneumoniae</i> |                  |            | <i>Acinetobacter pittii</i> |                  |            |
| Antibiotics   | CBCI system    | Clinical methods | Comparison | CBCI system                  | Clinical methods | Comparison | CBCI system                 | Clinical methods | Comparison |
| Amikacin      | ≤2             | ≤2               | S/S        | ≤2                           | ≤2               | S/S        | ≤2                          | ≤2               | S/S        |
| Tobramycin    | 16             | ≥16              | R/R        | 8                            | 8                | I/I        | ≤2                          | ≤1               | S/S        |
| Levofloxacin  | 1              | 1                | I/I        | 1                            | 1                | I/I        | ≤0.25                       | ≤0.12            | S/S        |
| Ampicillin    | ≥100           | ≥32              | R/R        | /                            | /                | /          | /                           | /                | /          |
| Gentamycin    | /              | /                | /          | ≥32                          | ≥16              | R/R        | /                           | /                | /          |
| Meropenem     | /              | /                | /          | /                            | /                | /          | ≤0.25                       | ≤0.25            | S/S        |

Specific information on the three clinical samples obtained from the inspection report is as follows: Sample 1 was diagnosed with a UTI and the pathogen identified was *Escherichia coli* ( $\geq 10^5$  CFU/mL); Sample 2 was diagnosed with a febrile infection and the pathogen identified was *K. pneumoniae* ( $\geq 10^5$  CFU/mL); Sample 3 was diagnosed with an elevated prostate specific antigen (PSA) and the pathogen identified was *Acinetobacter pittii* ( $\geq 10^5$  CFU/mL). Urine culture bacterial colony counts  $\geq 10^5$  CFU/mL is diagnosed as UTIs, and the above three samples were UTIs.
